# Supplementary material for: Synthesis of TS-1 submicrocrystals from inorganic reactants by a seed method for the vapor Beckmann rearrangement of cyclohexanone oxime
Source: Royal Society of Chemistry journal article supplement (doi:10.1039/c3ra43455a), 2013-01-01
Supplement: c3ra43455a.pdf [file c3ra43455a.pdf]

## Electronic Supplementary Information for

# Synthesis of TS-1 Submicrocrystals from Inorganic Reactants by Seed Method for the Vapor Beckmann Rearrangement of Cyclohexanone Oxime

Huijuan Wei, Tian Zhao, Yangqing Liu, Guanghe Li, Xiangyu Wang\* and Baojun Li\*

Institute of Industrial Catalysis and College of Chemistry and Molecular Engineering, Zhengzhou University, Zhengzhou 450001, P R China

\*Corresponding author E-mail: xiangyuwang@zzu.edu.cn and lbjfc1@zzu.edu.cn.

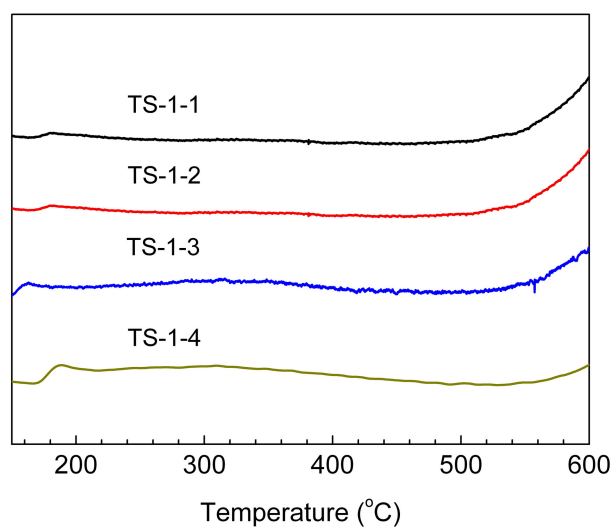

Figure S1. NH<sub>3</sub>-TPD patterns of TS-1.
